# Supplementary material
Source: Springer Nature journal article supplement (https://www.springermedizin.de/resource/supplementary/13618_2012_45_MOESM5_ESM.pdf/9681036)

**(a) Glyoxal**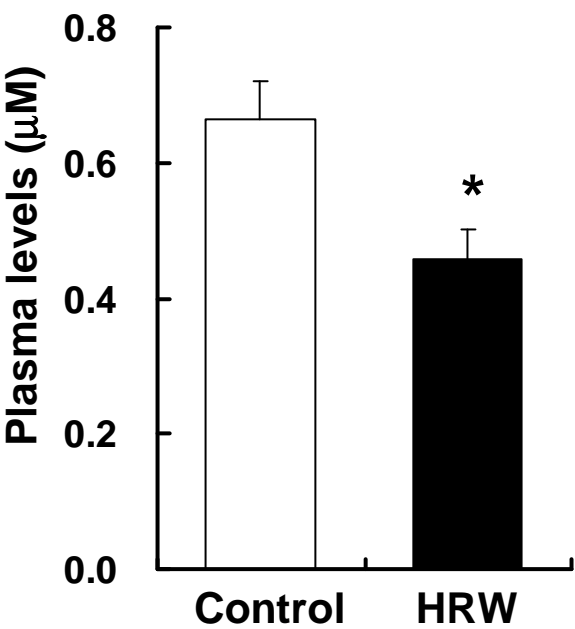**(b) Methylglyoxal**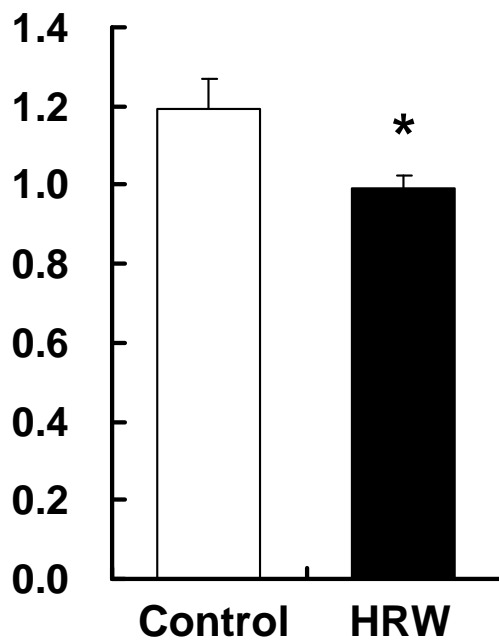**(c) 3-deoxyglucosone**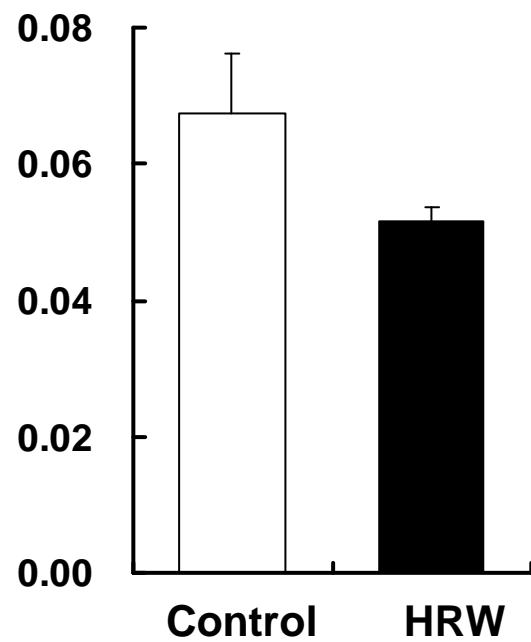**(d) Glyoxal**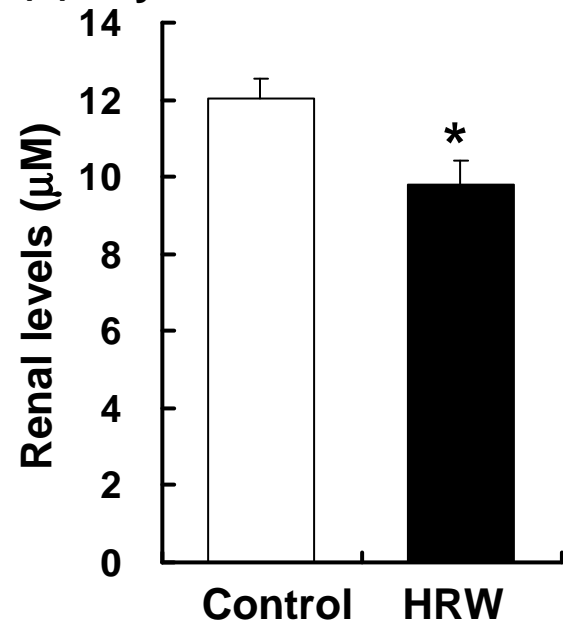**(e) Methylglyoxal**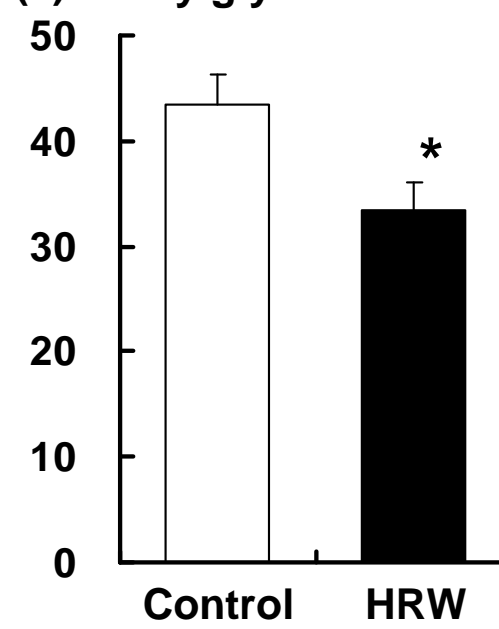**(f) 3-deoxyglucosone**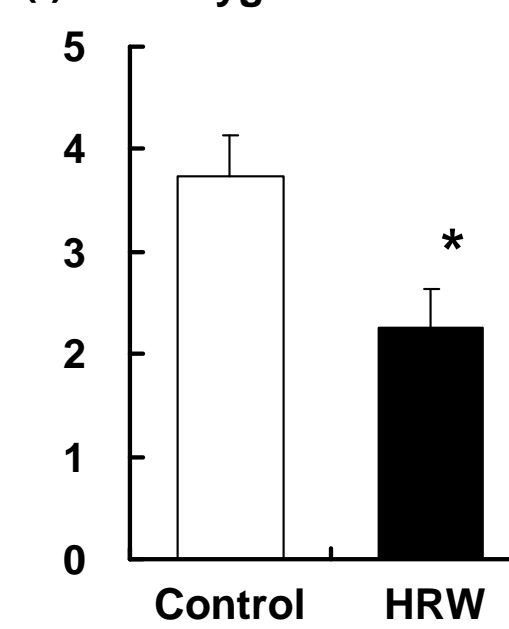

Supplement: MOESM5 [file 9681036]
